# Supplementary material for: Exploring the ENSO modulation of the QBO periods with GISS E2.2 models
Source: Copernicus journal article supplement (doi:10.5194/acp-24-509-2024), 2024-01-15
Supplement: Supplementary file 1 [file acp-24-509-2024-supplement.pdf]

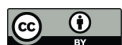

*Supplement of*

## **Exploring the ENSO modulation of the QBO periods with GISS E2.2 models**

**Tiehan Zhou et al.**

*Correspondence to:* Tiehan Zhou (tz2131@columbia.edu)

The copyright of individual parts of the supplement might differ from the article licence.

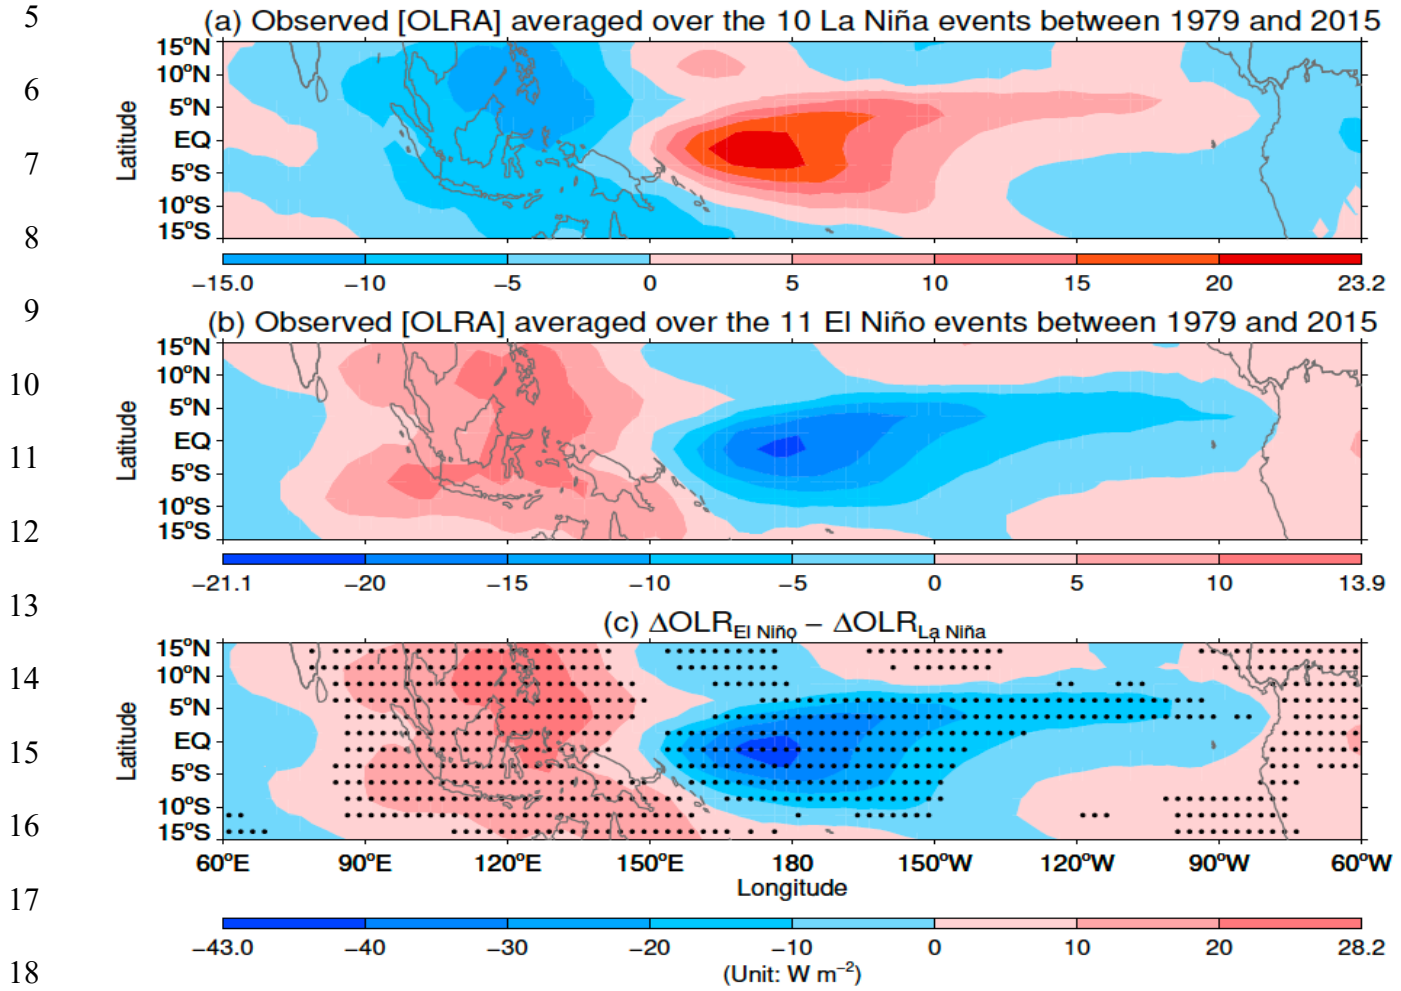

**Fig. S1.** Same as Fig. 2 except that we use [OLRA] to conduct statistical analysis. The stippling shows statistically significant grid points at the 95% confidence level.

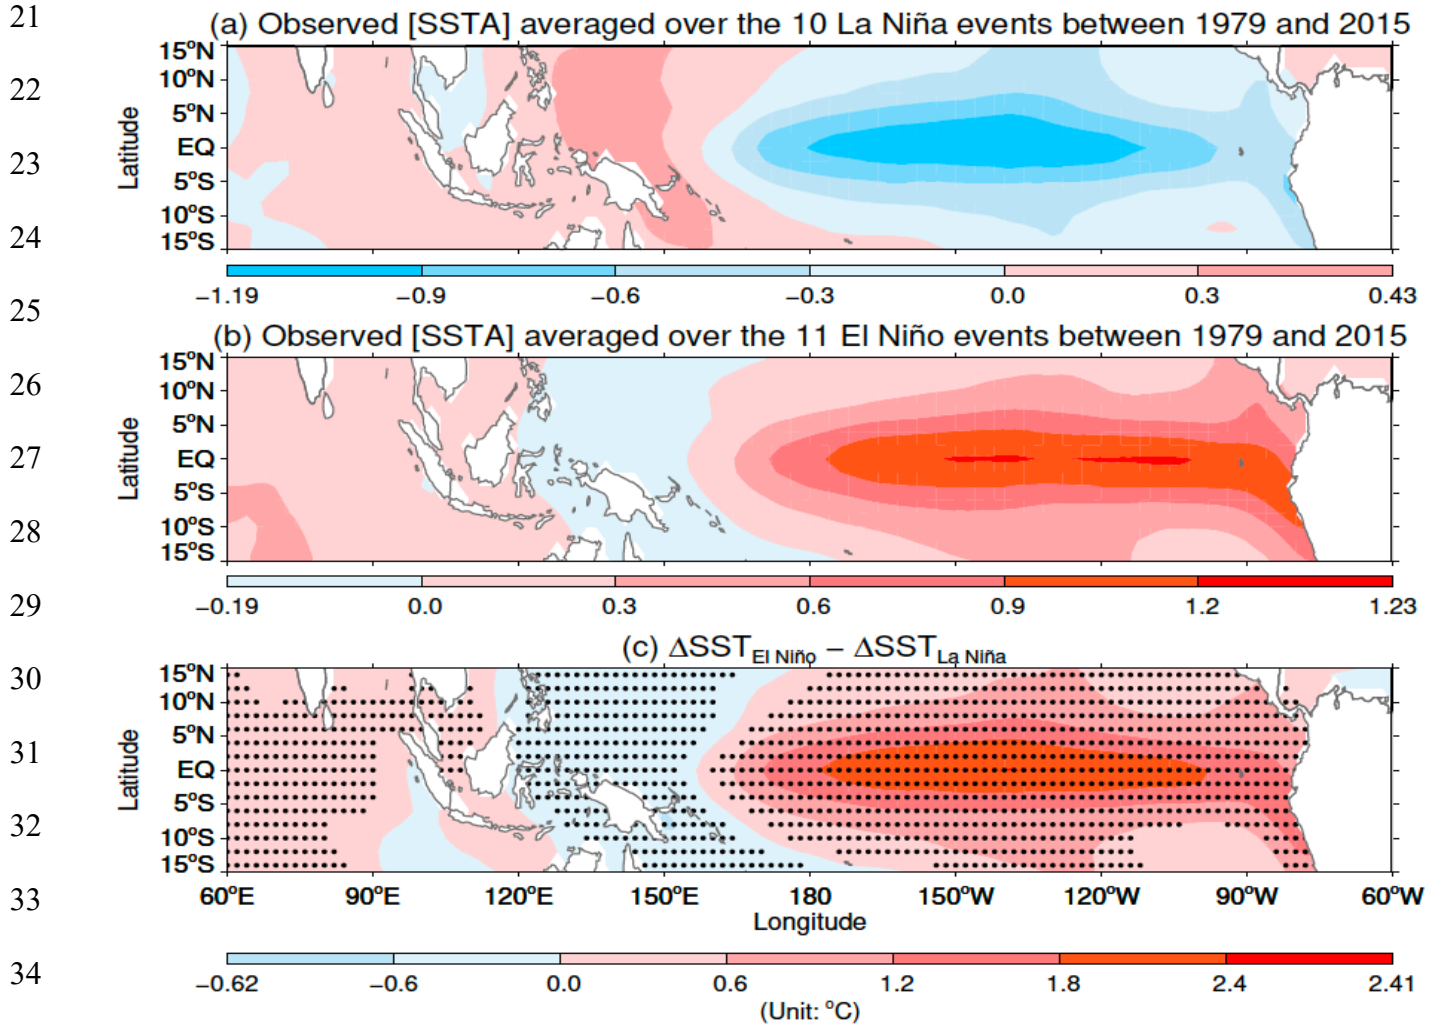

35 **Fig. S2.** Same as Fig. 3 except that we use [SSTA] to conduct statistical analysis. The stippling shows  
 36 statistically significant grid points at the 95% confidence level.

37  
38  
39  
40  
41  
42  
43  
44  
45  
46  
47  
48  
49  
50  
51

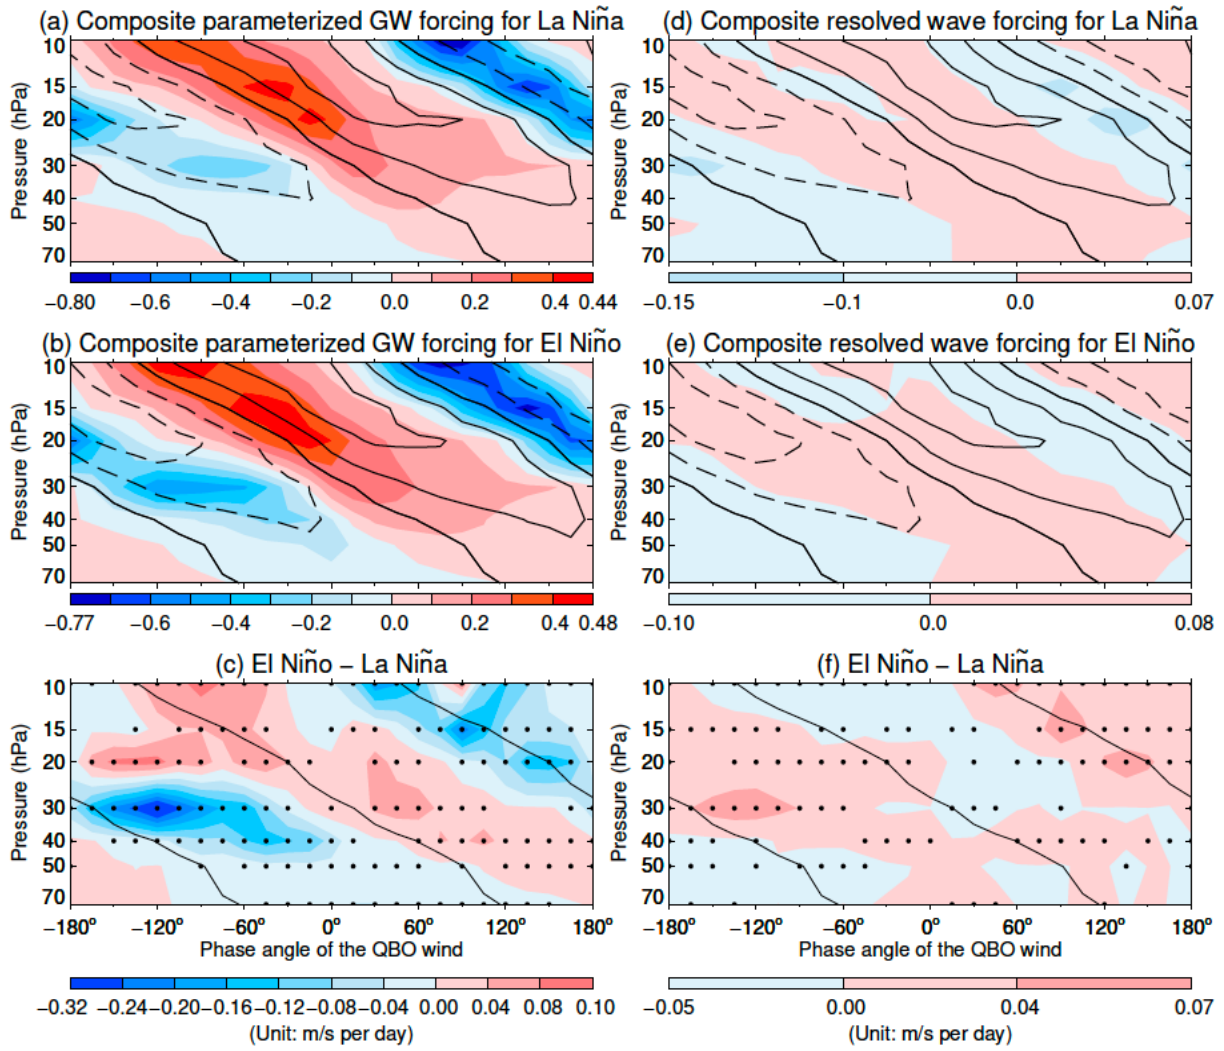

52 **Fig. S3.** Same as Fig. 4 except that for all profiles of a diagnostic falling into each bin, we first averaged  
 53 the profiles from any identical ENSO event into a mean profile in that bin, and that the resultant mean  
 54 profiles of that diagnostic from all ENSO events in that bin were used to conduct our statistical analyses.  
 55 The stippling shows statistically significant grids at the 95% confidence level. Note that in order to  
 56 consistent with the FUB data, we only use the diagnostics at 10, 15, 20, 30, 40, 50, and 70 hPa  
 57 levels.

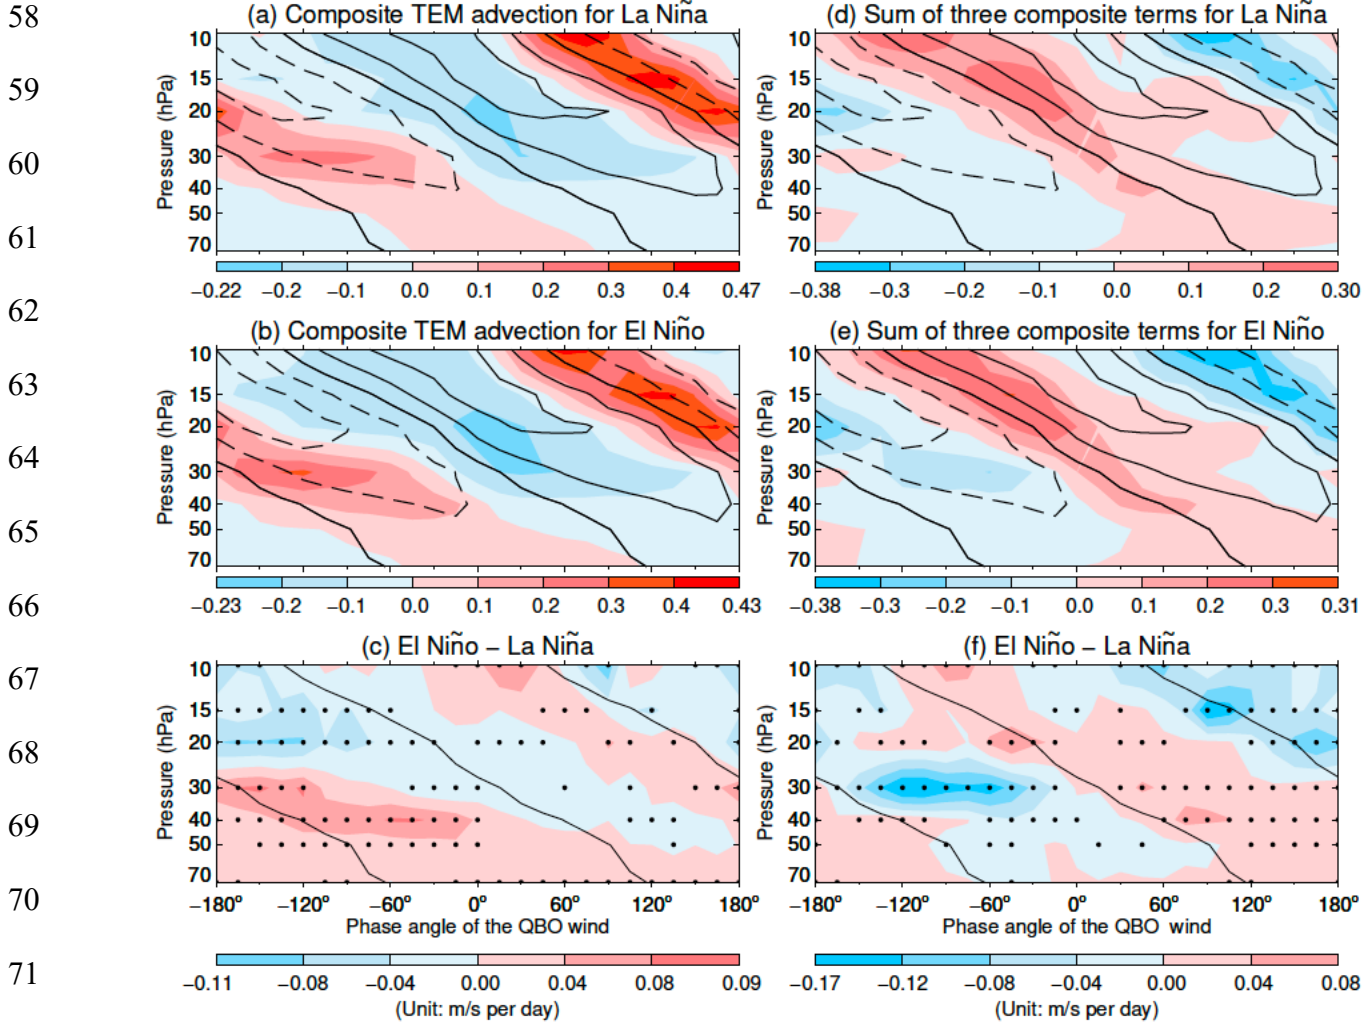

72 **Fig. S4.** Same as Fig. 5 except using the same method as explained in Fig. S3. The stippling shows  
 73 statistically significant grids at the 95% confidence level.

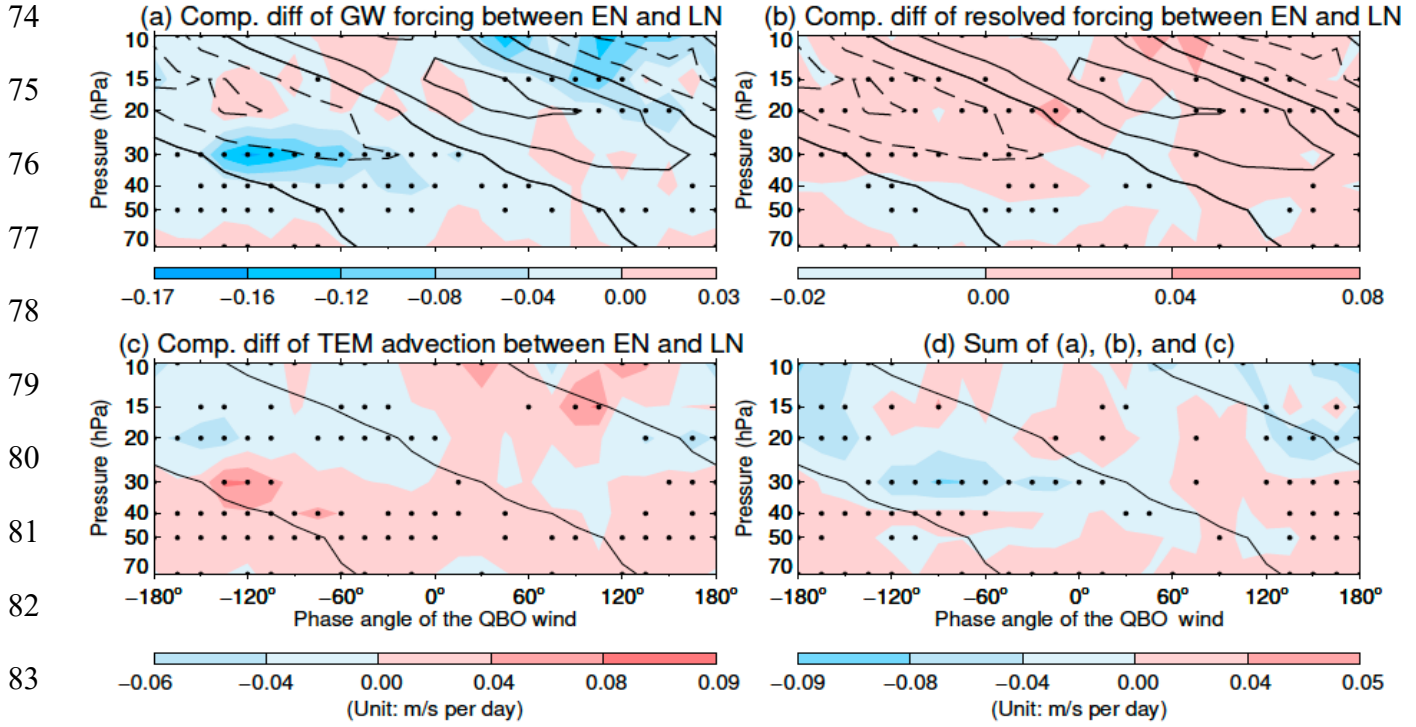

84 **Fig. S5.** Same as Fig. 6 except using the same method as explained in Fig. S3. The stippling shows  
 85 statistically significant grids at the 95% confidence level.



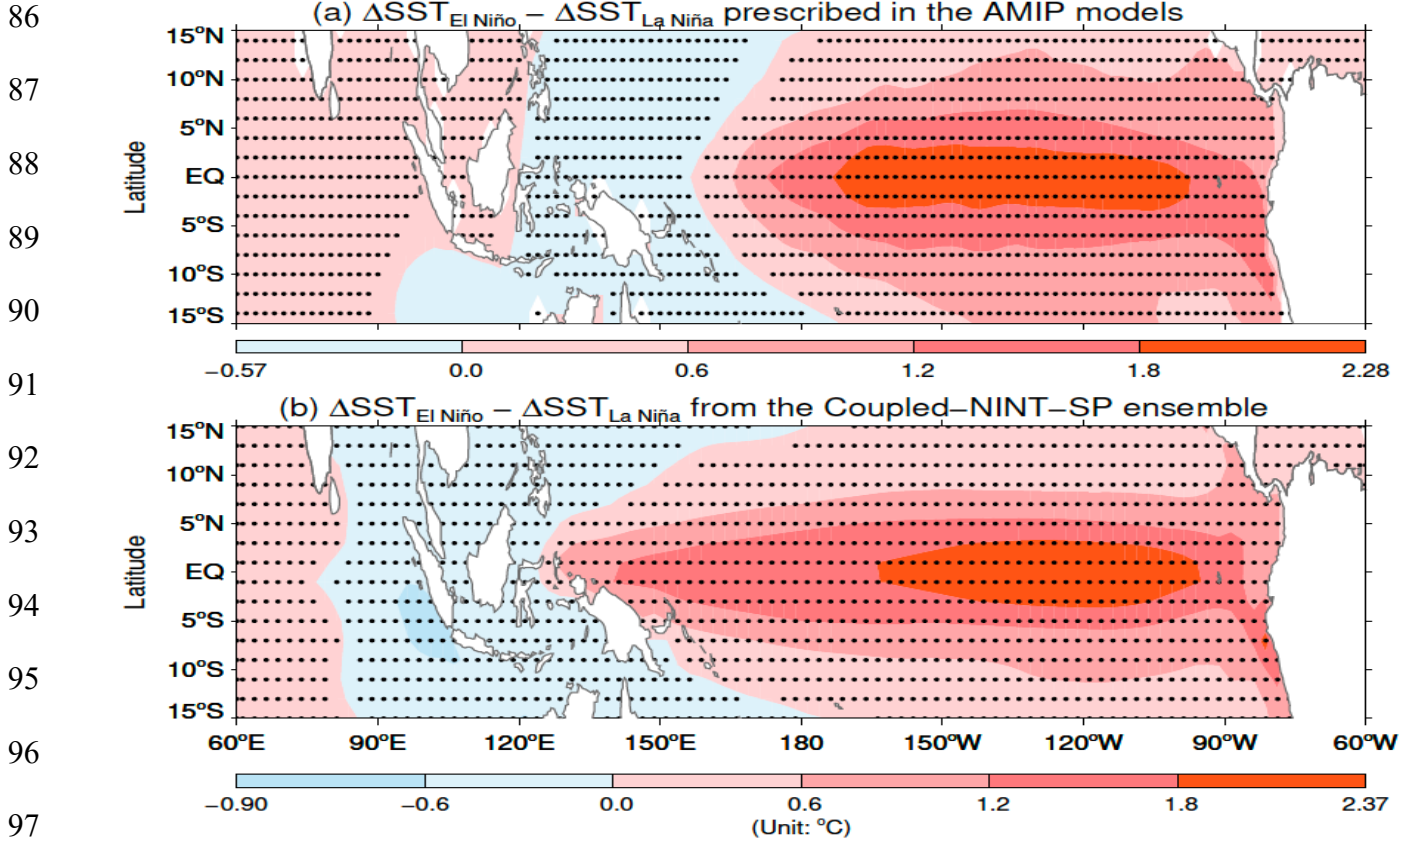

**Fig. S6.** Same as Fig. 8 except that we use [SSTA] as our sample points to conduct statistical analysis. The stippling shows statistically significant grid points at the 95% confidence level.

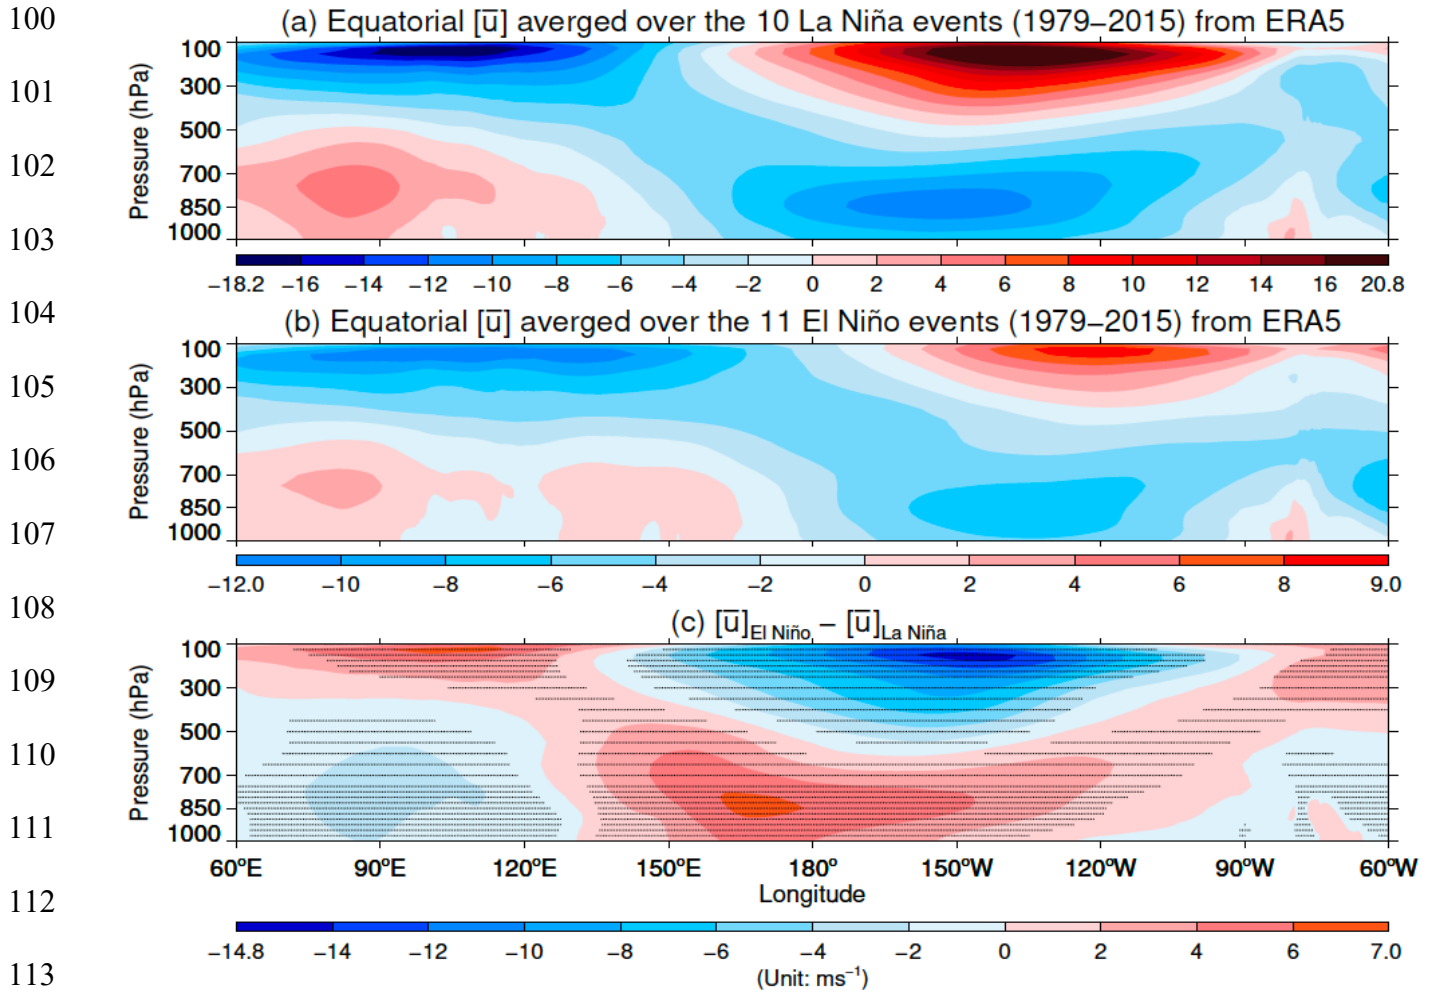

113 **Fig. S7.** Same as Fig. 10 except that we use the equatorial  $[u]$  to conduct statistical analyses. The stippling  
 114 shows statistically significant grid points at the 95% confidence level.  
 115  
 116



117  
118  
119  
120  
121  
122  
123  
124  
125  
126

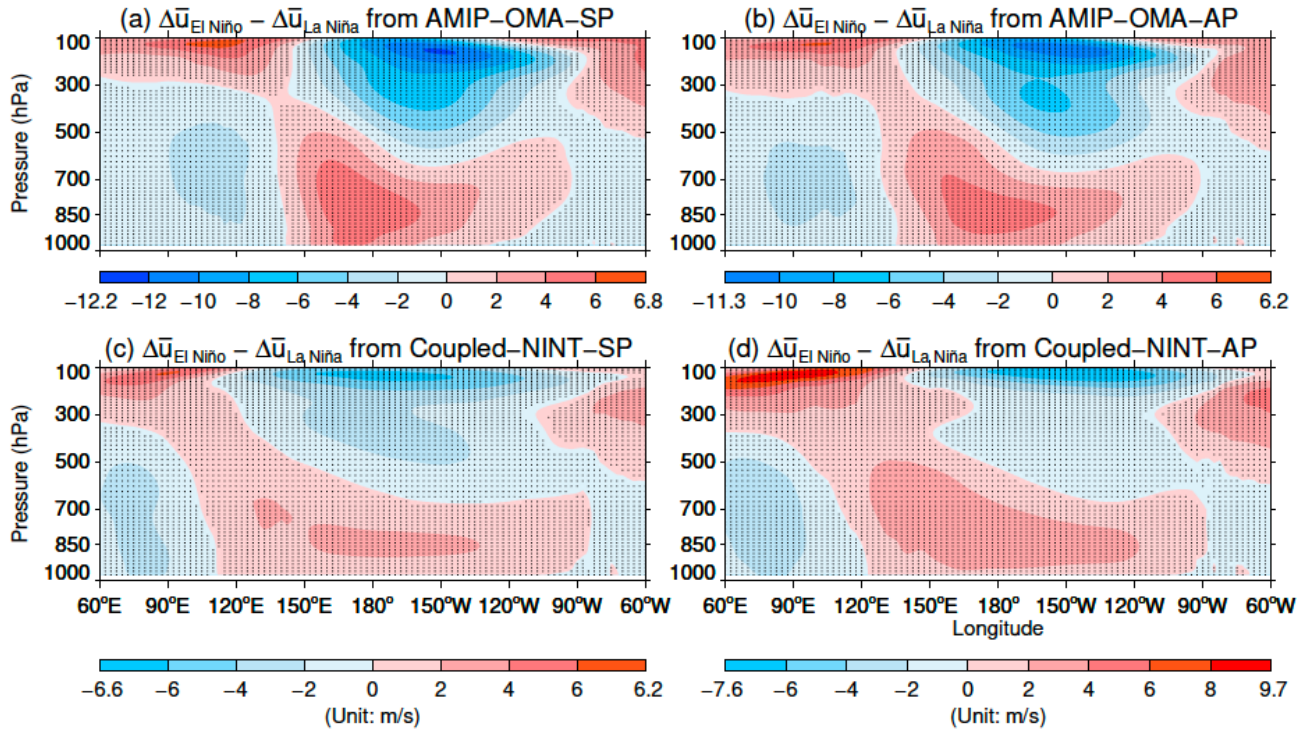

127 **Fig. S8.** Same as Fig. 11 except that we use the equatorial [u] to conduct statistical analyses. The stippling  
128 shows statistically significant grid points at the 95% confidence level.

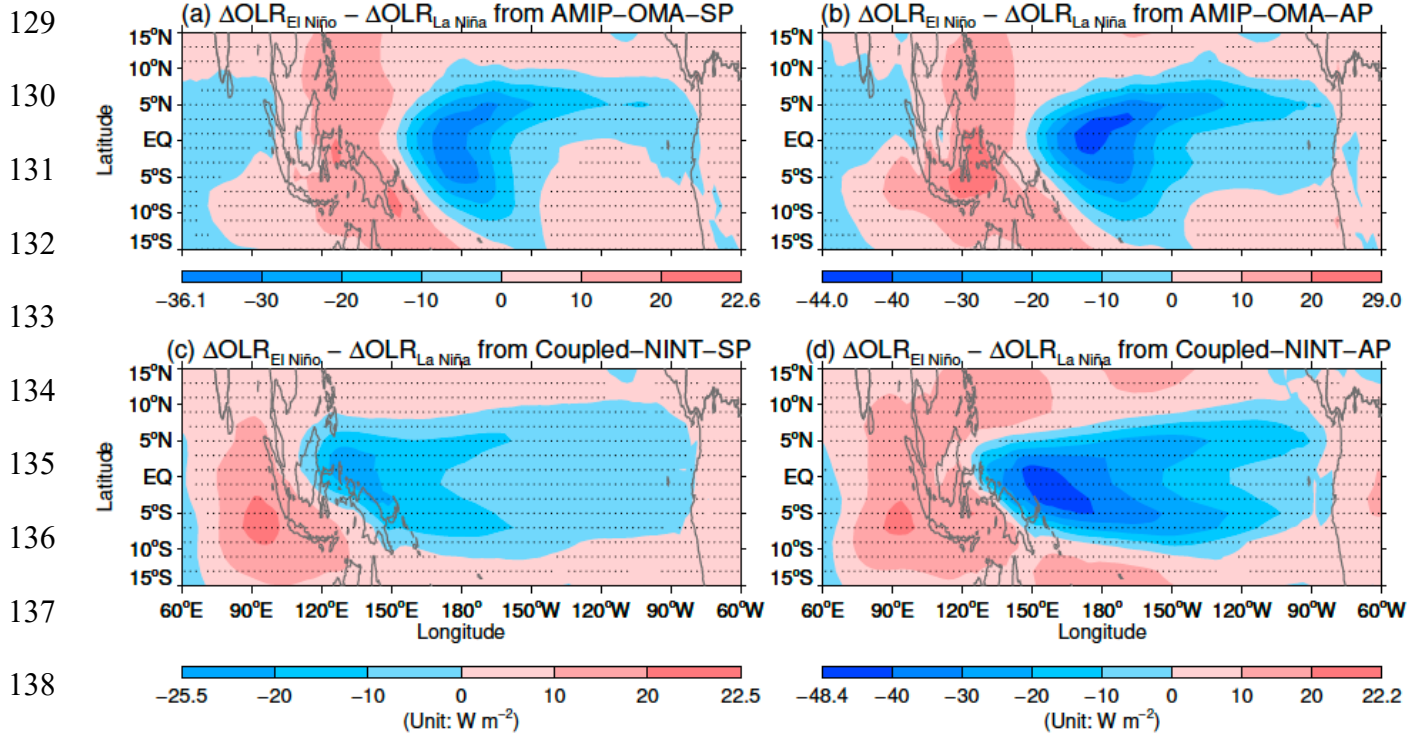

139 **Fig. S9.** Same as Fig. 12 except that we use [OLRA] to conduct statistical analyses. The stippling  
 140 shows statistically significant grid points at the 95% confidence level.
